# Supplementary material for: Solution-processed and high-performance ionic-paper gated field-effect transistors from two-dimensional layered semiconductor nanosheets with high thermal resolution
Source: Royal Society of Chemistry journal article supplement (doi:10.1039/d1tc05138e), 2021-12-20
Supplement: d1tc05138e1.pdf [file d1tc05138e1.pdf]

# Solution-processed and High-performance Ionic-paper Gated Field-effect Transistors from Two-dimensional Layered Semiconductor Nanosheets with High Thermal Resolution

Guokeng Liu <sup>a,b</sup>, Chunyang Jin <sup>a,b</sup>, Binlai Hu <sup>a,b</sup>, Lihua Zhang <sup>a,b</sup>, Guozheng Zeng <sup>a,b</sup>, Haihua Xu <sup>a,b\*</sup>

<sup>a</sup>Department of Biomedical and Engineering, School of Medicine, Shenzhen University, Shenzhen, China.

<sup>b</sup>Guangdong Key Laboratory for Biomedical Measurements and Ultrasound Imaging, Shenzhen, China.

\*Corresponding E-mail address: [hwxu@szu.edu.cn](mailto:hwxu@szu.edu.cn)

## Support Information

### 1. Scanning electron microscope (SEM) of the WSe<sub>2</sub> LSNs

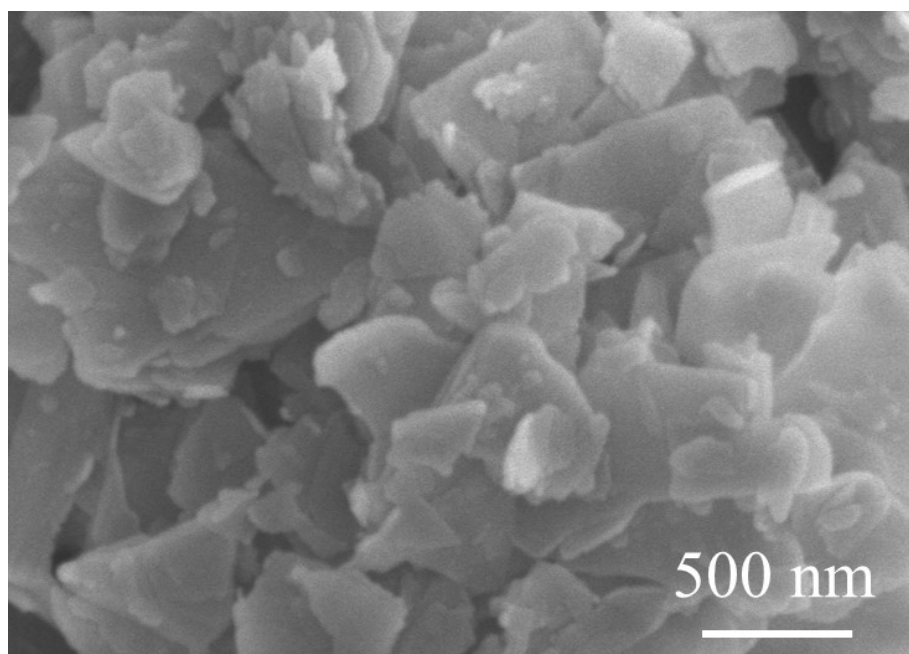

**Fig. S1** The SEM image of the WSe<sub>2</sub> LSNs obtained from liquid-phase exfoliation.

## 2. The EDL capacitance of the “*i*-gel” film

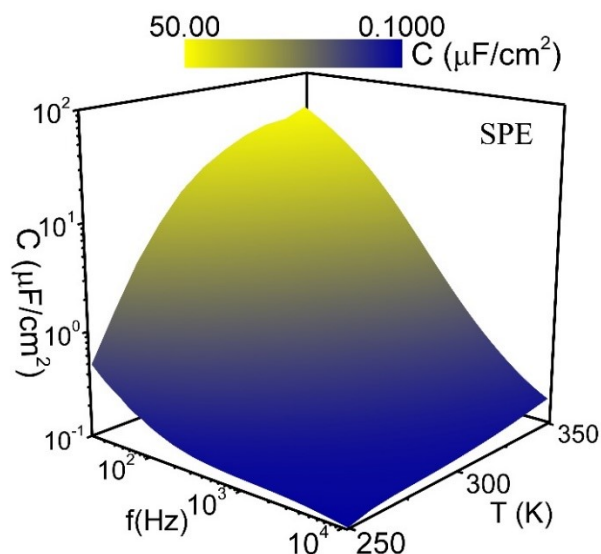

**Fig. S2** Contour map of the temperature-dependent EDL capacitance as a function of frequency at the *i*-gel/LSN interface.

## 3. Off-current of the *i*-paper gated MoS<sub>2</sub> FETs

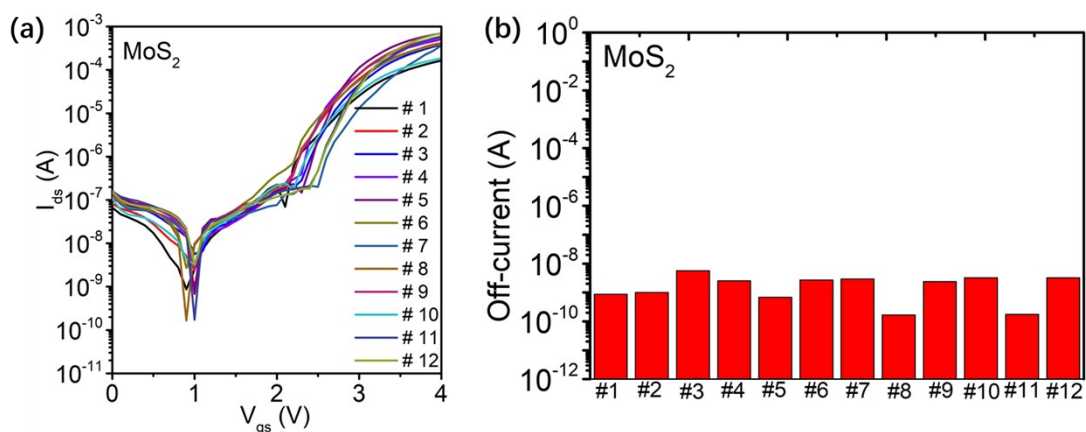

**Fig. S3** (a) Transfer characteristics and (b) the off-currents of the 12 *i*-paper gated MoS<sub>2</sub> FETs.

## 4. Off-current of the *i*-paper gated MoS<sub>2</sub> FETs

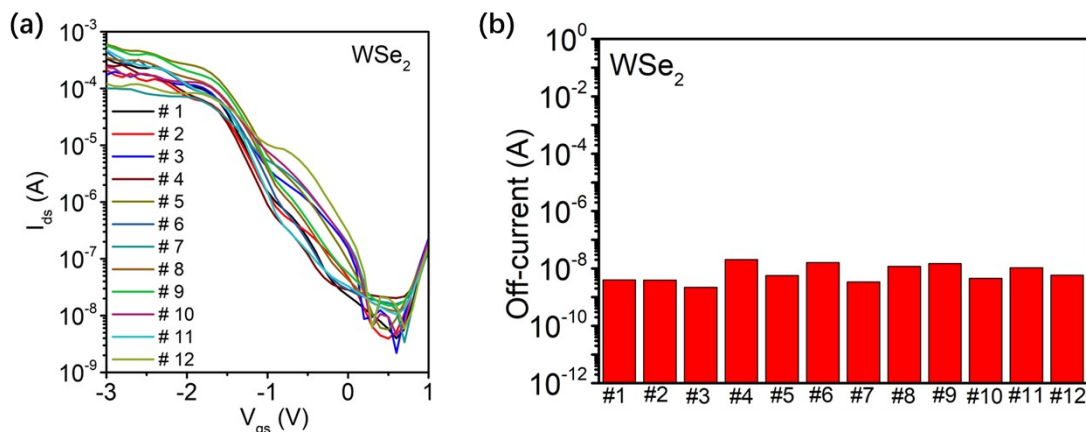

**Fig. S4** (a) Transfer characteristics and (b) the off-currents of the 12 *i*-paper gated WSe<sub>2</sub> FETs.

## 5. Operation stability of the thermal sensor

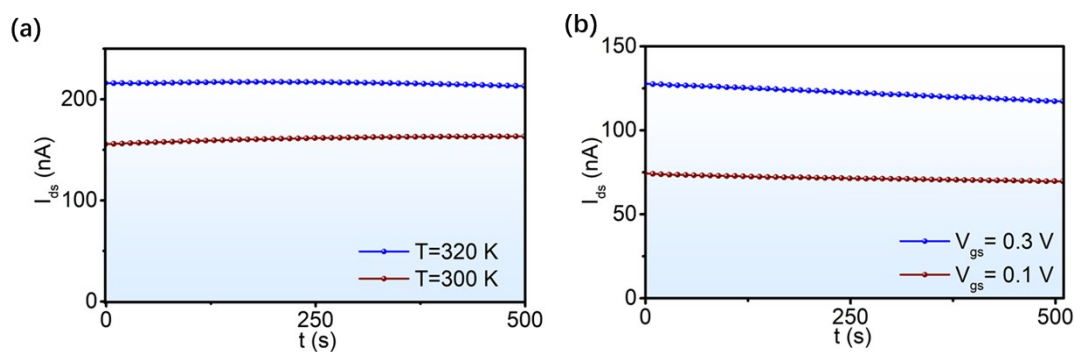

**Fig. S5** Real-time  $I_{ds}$  curves of the n-type *i*-gel gated LSN FET at (a) constant temperatures ( $T=320$  K and 300 K) and (b) constant biases ( $V_{gs}=0.3$  V and 0.1 V).

## 6. Transient response of the thermal sensor

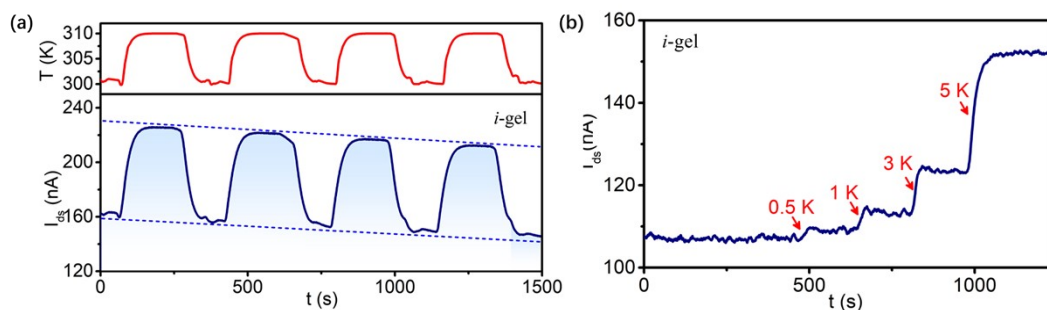

**Fig. S6** (a) Transient response of the thermal sensor using the n-type *i*-gel gated LSN FET as switching the temperature from 300 K to 310 K. (b) Real-time recording of  $I_{ds}$  at  $V_{gs}=0.1$  V, measured by increasing different temperatures.
